# Supplementary figures and images for: Task-dependent optimal representations for cerebellar learning
Source: eLife journal article supplement (doi:10.7554/elife.82914), 2023-09-06

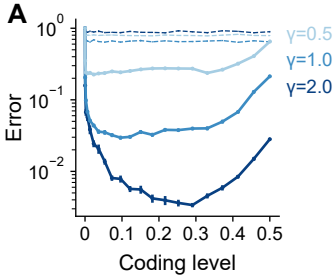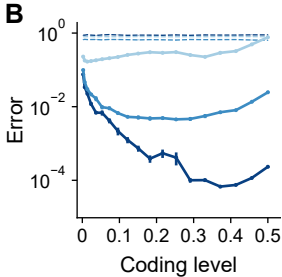

Supplement: supp [file elife-82914-supp-v1.zip]

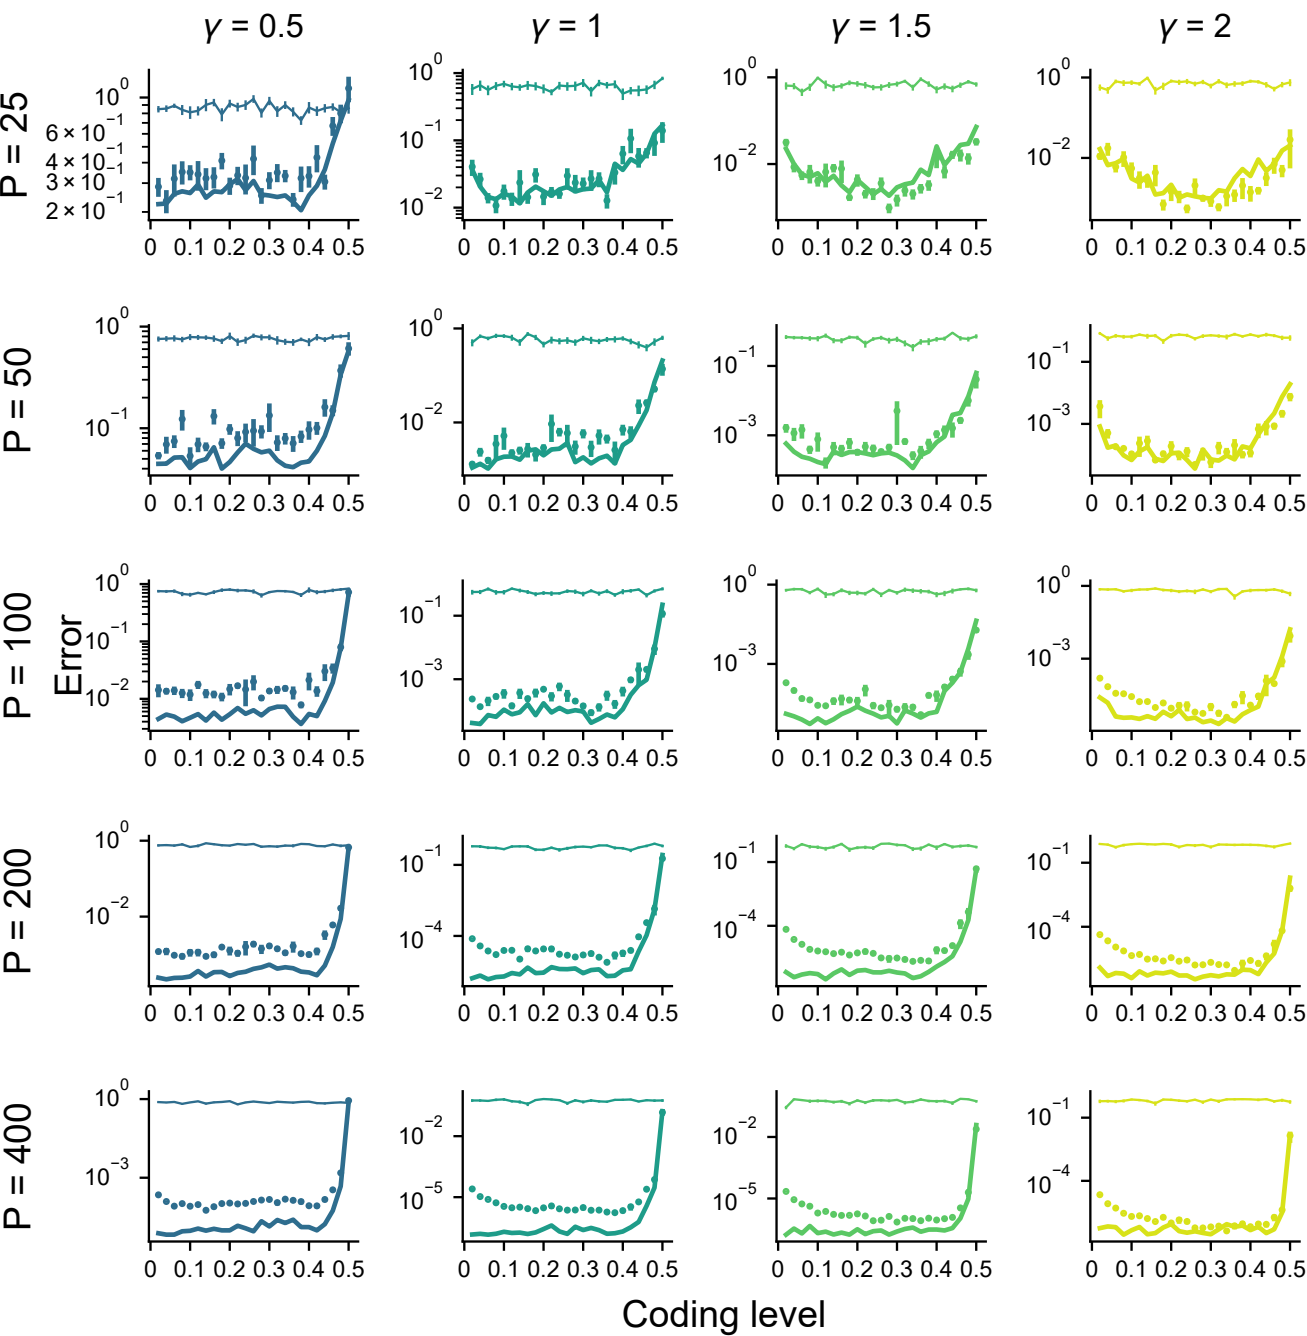

Supplement: supp [file elife-82914-supp-v1.zip]

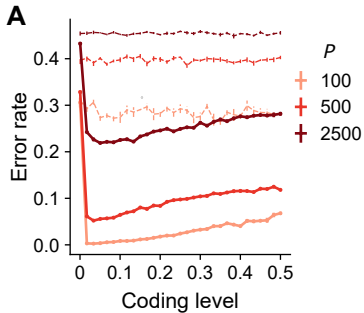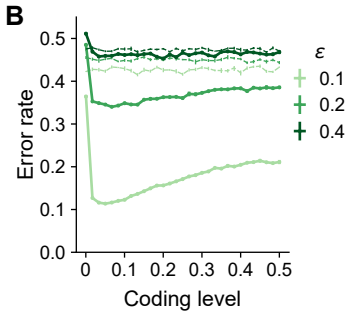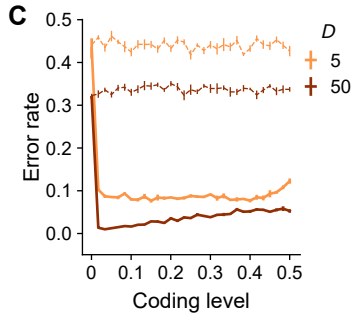

Supplement: supp [file elife-82914-supp-v1.zip]

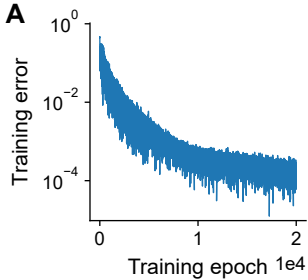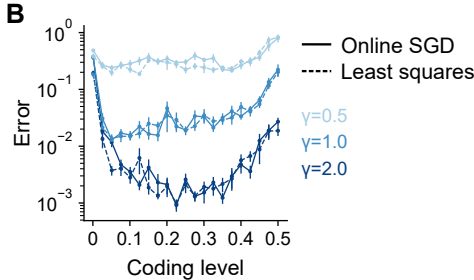

Supplement: supp [file elife-82914-supp-v1.zip]

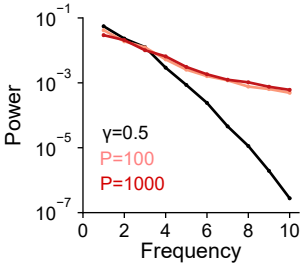

Supplement: supp [file elife-82914-supp-v1.zip]

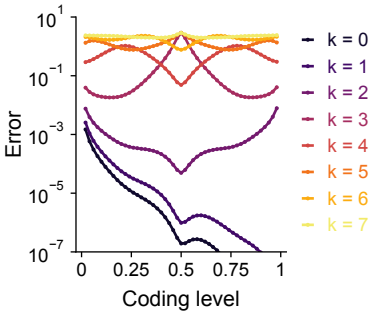

Supplement: supp [file elife-82914-supp-v1.zip]

**A**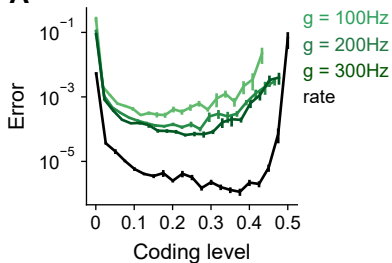**B**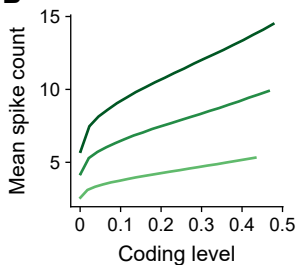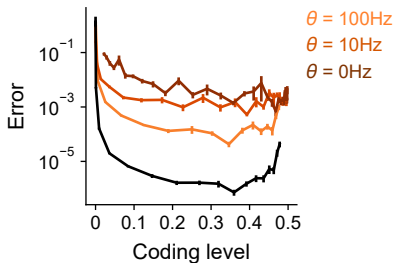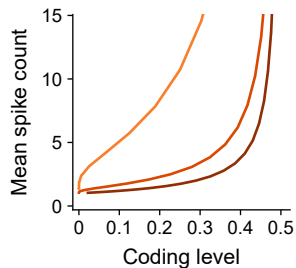

Supplement: supp [file elife-82914-supp-v1.zip]
